# Supplementary material
Source: PubMed Central journal article supplement (PMC4906374)
Supplement: id6b00034_si_001.pdf [file id6b00034_si_001.pdf]

# Supporting Information

## **Global Profiling and Inhibition of Protein Lipidation in Vector and Host Stages of the Sleeping Sickness Parasite *Trypanosoma brucei***

Megan H. Wright,\* Daniel Paape, Helen P. Price, Deborah F. Smith, and Edward W. Tate\*

\* corresponding authors: [megan.wright@tum.de](mailto:megan.wright@tum.de); [e.tate@imperial.ac.uk](mailto:e.tate@imperial.ac.uk)

This document contains Supporting Data, in the form of Figures (14) and a list of supporting Tables (7, available as separate Excel files), and Supporting Methods. A separate Supporting Data File contains MS/MS spectra of YnMyr modified peptides.

## Supporting Data

### Supporting Figures

**Fig. S1:** Structure of capture reagents AzTB, YnTB, AzRB, AzRTB

**Fig. S2:** Full gels Figs. 1 & 2

**Fig. S3:** Pictures of YnMyr vs Myr-treated BSF parasites

**Fig. S4:** NaOH optimisation BSF; +/- base treatment timecourse YnMyr; +/- base-treatment timecourse YnPal vs YnMyr

**Fig. S5:** Example pull-down

**Fig. S6:** Examples of modified peptide assigned spectra

**Fig. S7:** Comparison of BSF vs PCF data with literature datasets

**Fig. S8:** Heatmap comparing BSF and PCF enriched hits with functional classification

**Fig. S9:** T-test volcano plot YnPal vs Pal proteomic data

**Fig. S10:** In-gel fluorescence analysis of NMT inhibitors

**Fig. S11:** Neutravidin-HRP Western blots for inhibition proteomics

**Fig. S12:** Heat map and hierarchical clustering of hits from inhibition experiment

**Fig. S13:** Profile plots of enrichment in response to inhibitor **2** and for 'medium confidence' hits

**Fig. S14:** Prediction of *N*-myristoylation of high confidence NMT substrates with bioinformatics tools

### Supporting Tables

Supporting tables are available as separate Excel spreadsheets. Each contains a key describing the contents of the file.

**Table S1:** BSF YnMyr data

**Table S2:** PCF YnMyr data

**Table S3:** Modified peptide comparisons

**Table S4:** BSF vs PCF comparison

**Table S5:** YnPal and comparison with YnMyr

**Table S6:** Inhibition data

**Table S7:** Prediction of *N*-myristoylation for all MG proteins, cross-referenced to current study

### Supporting Data File

Separate ZIP file. MS/MS spectra of YnMyr modified peptides. Best spectra shown.

## Contents

|                                     |    |
|-------------------------------------|----|
| Supporting Figures.....             | 1  |
| Supporting Methods.....             | 17 |
| Enzyme inhibition assays .....      | 17 |
| CuAAC labelling and pull-down ..... | 17 |
| Gel and Western blot analysis ..... | 17 |
| Proteomics experiments .....        | 18 |
| References .....                    | 19 |

## Supporting Figures

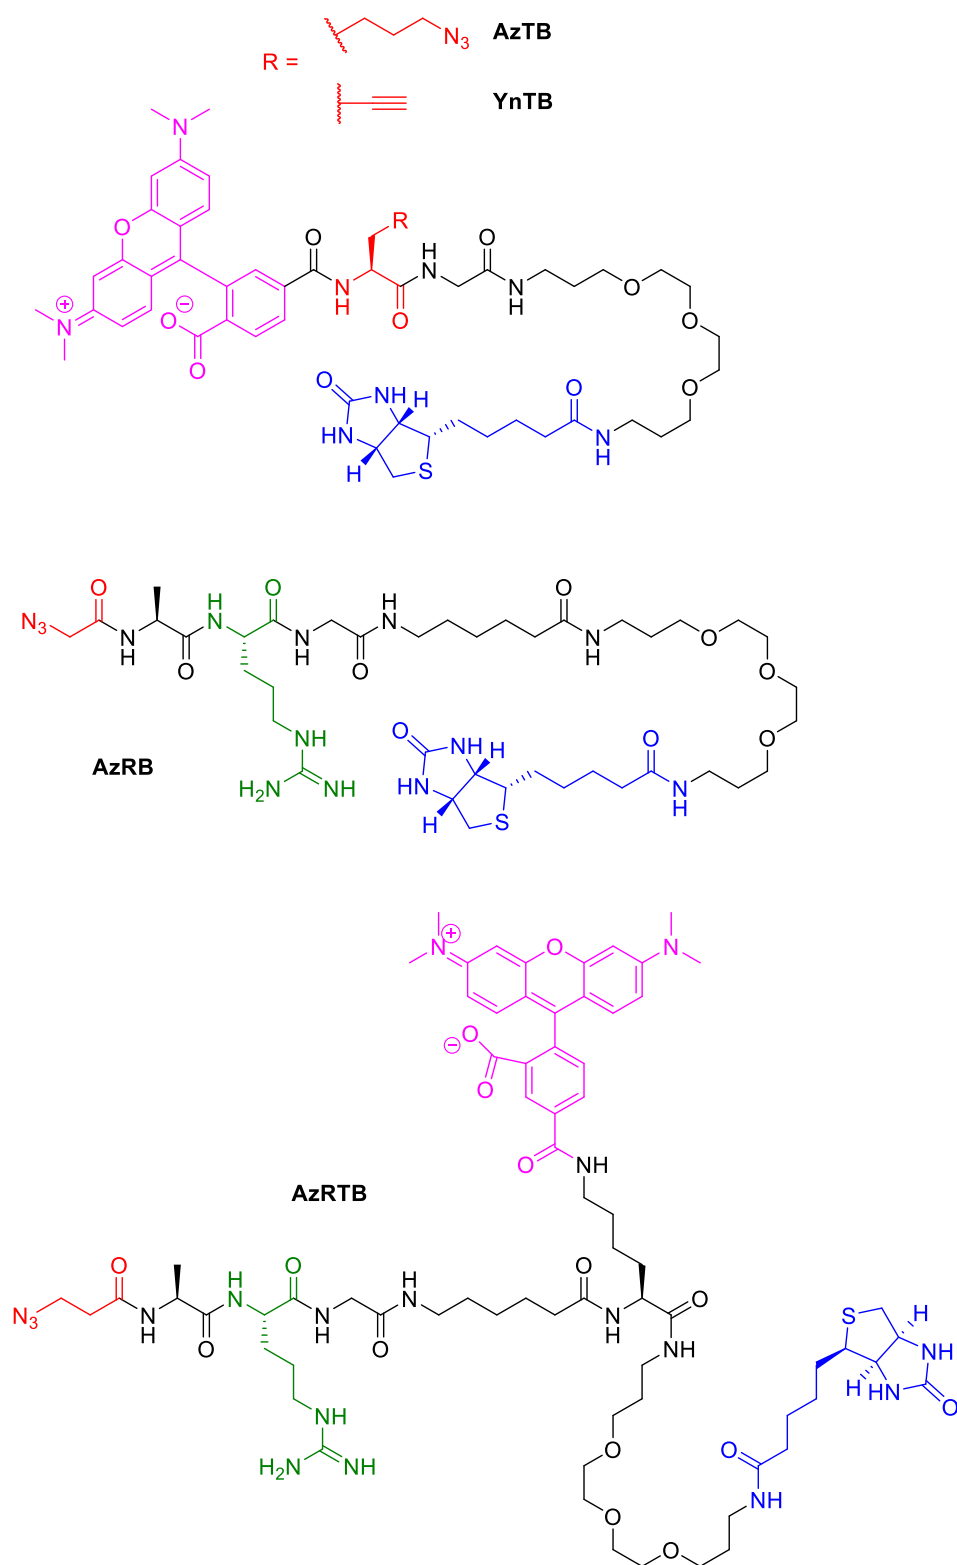

**Figure S1.** Structure of reagents for CuAAC.

**Fig. 1b**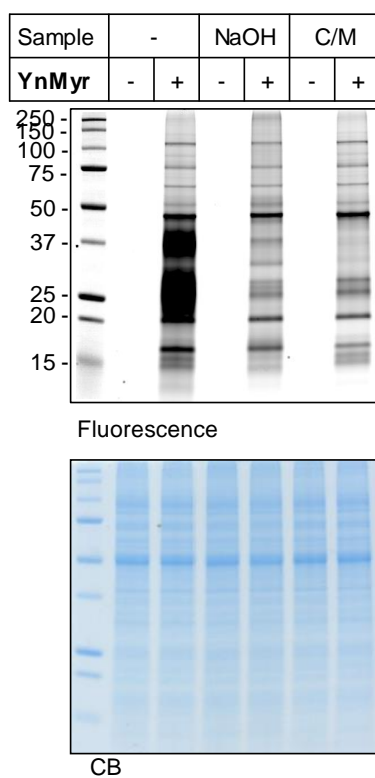**Fig. 1c**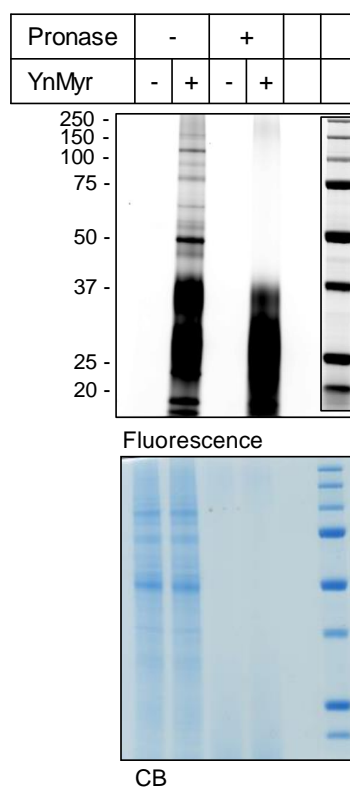**Fig. 2c**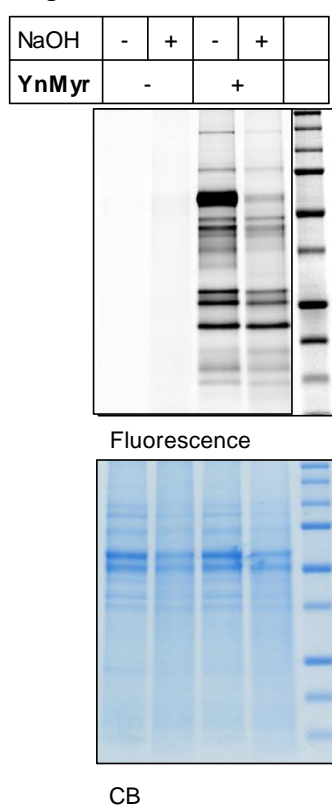**Fig. 2e**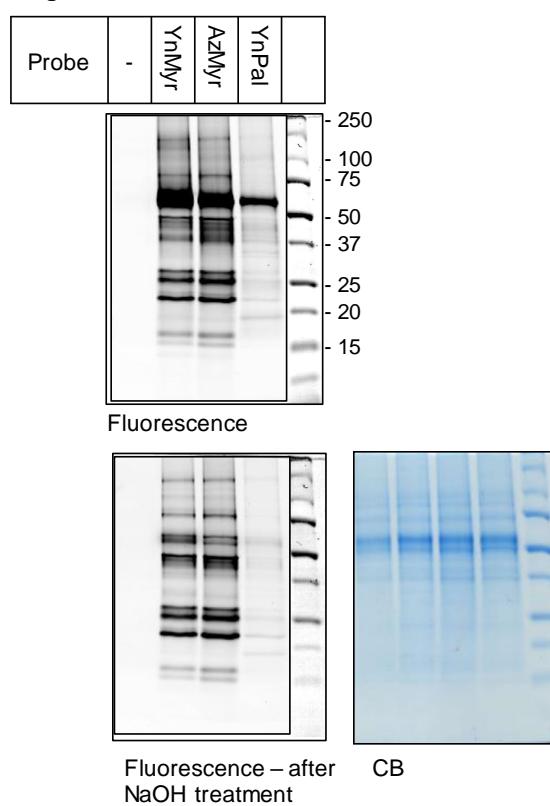**Figure S2.** Full gels from main text Figures 1 & 2. CB = Coomassie blue. Mw markers in kDa.

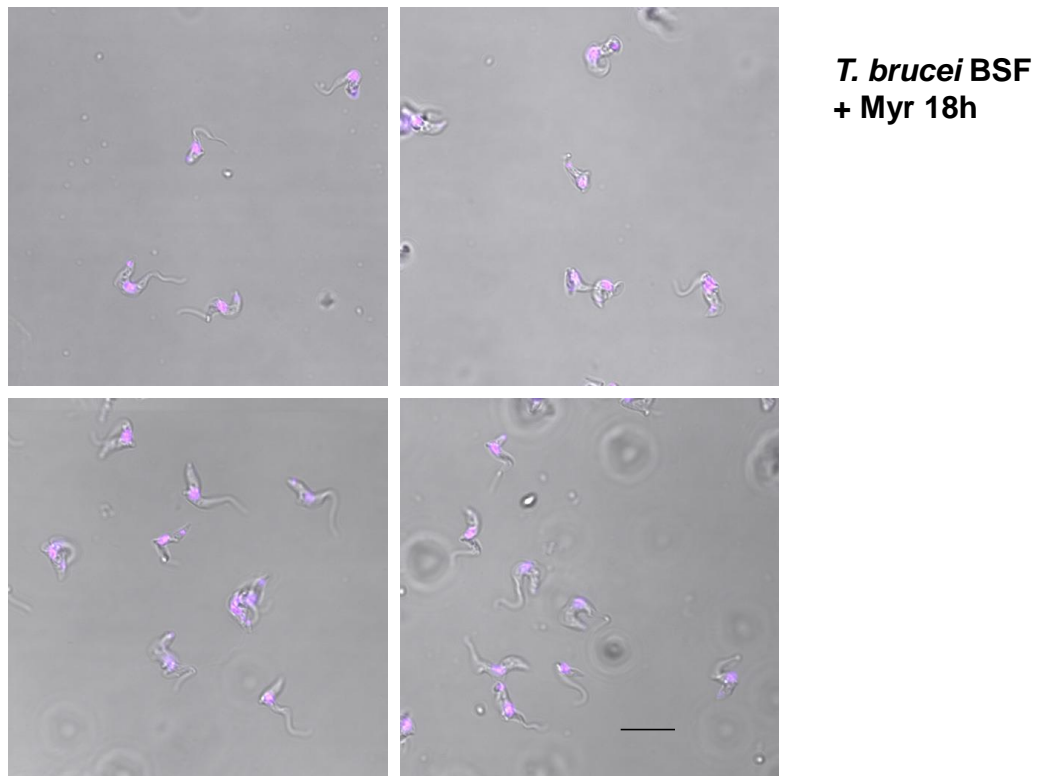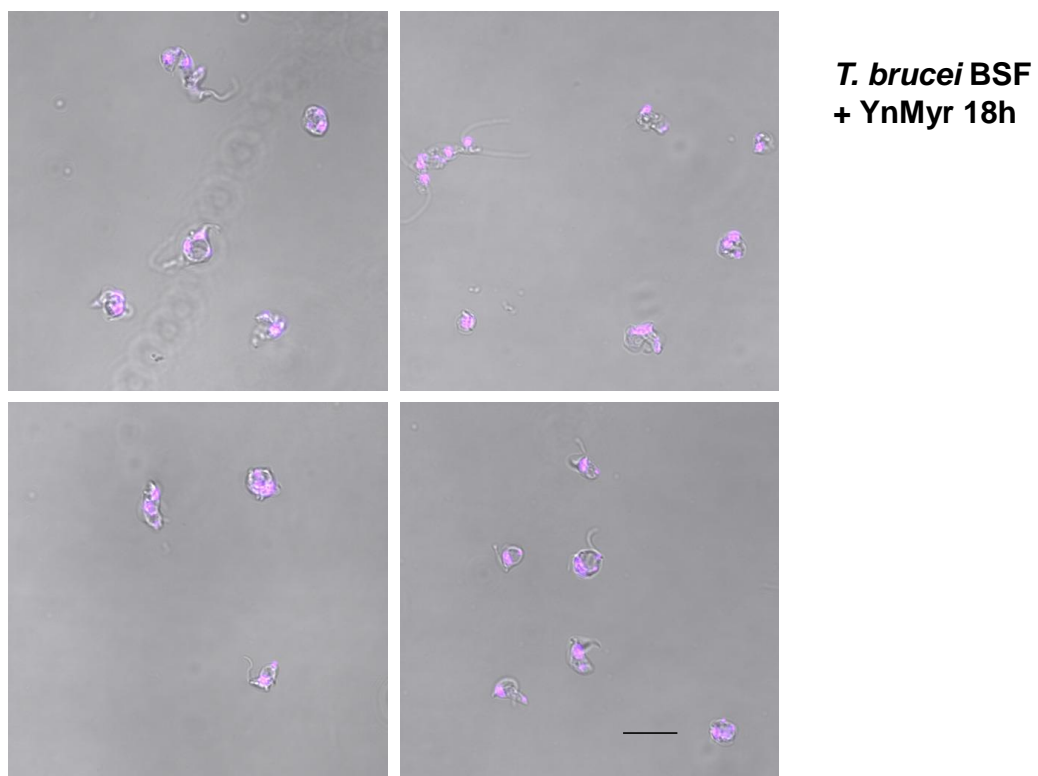

**Figure S3.** Related to Figure 2. Images of *T. brucei* BSF parasites treated with myristic acid (Myr) or YnMyr for 18 hours. YnMyr treated parasites exhibit an enlarged flagellar pocket. Scale bar: 10  $\mu$ m.

**a. BSF base optimisation**

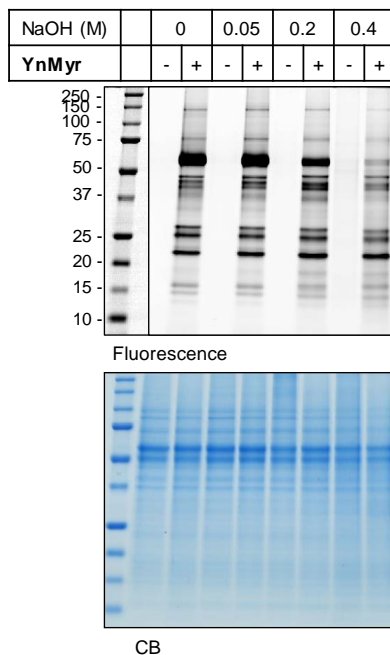

**b. Timecourse in YnMyr labelling and base-treatment**

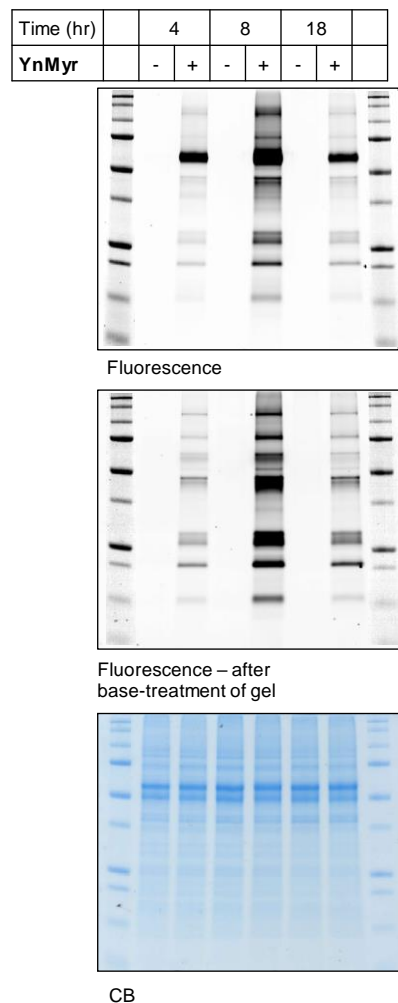

**c. Timecourse in YnMyr and YnPal: base-treatment**

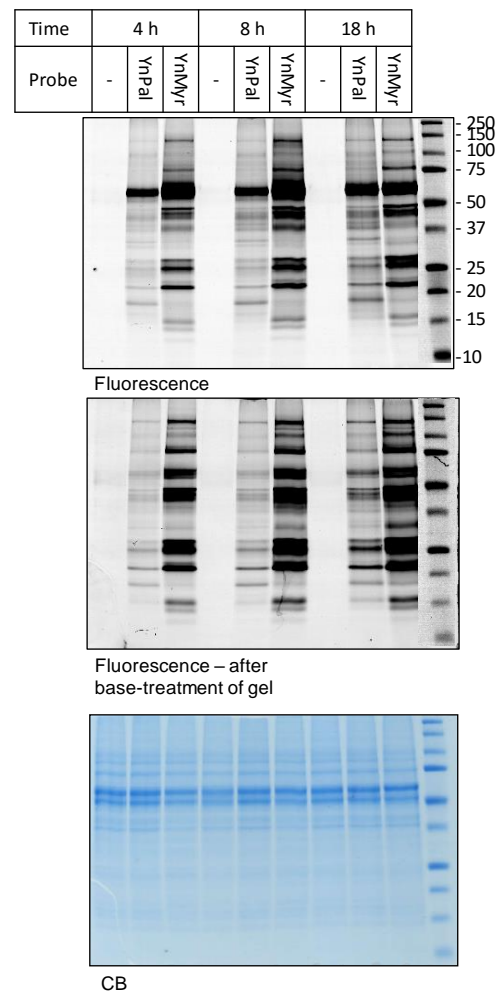

**Figure S4.** Optimisation of metabolic tagging in BSF parasites. **a.** Treatment of lysates from YnMyr or Myr (-) tagged parasites with different concentrations of base (NaOH) for removal of GPI-anchor labelling. **b.** YnMyr labelling for different time periods. **c.** Comparison of YnMyr and YnPal labelling at different timepoints. CB = Coomassie blue. Mw markers in kDa.

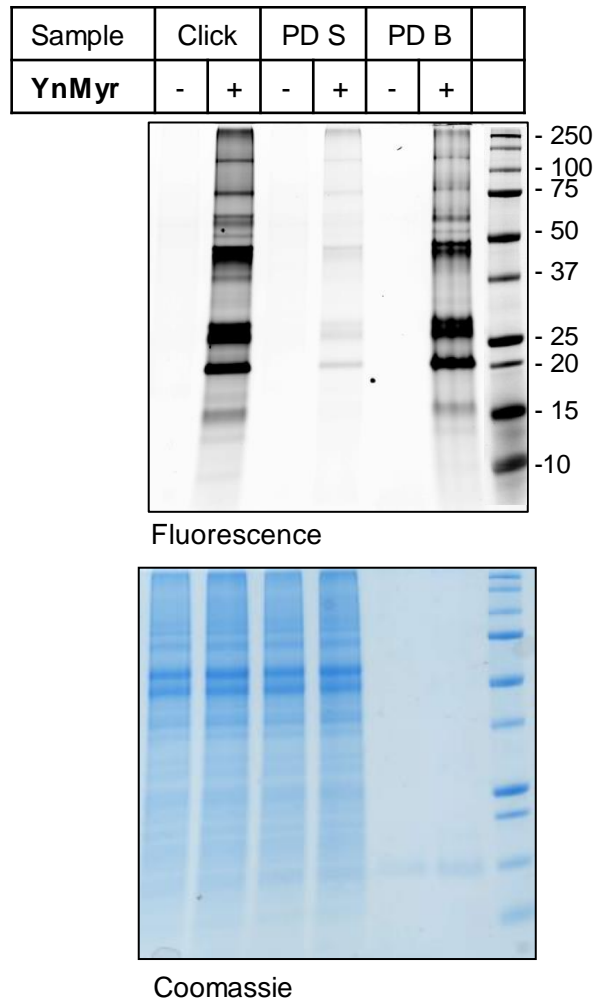

**Figure S5.** Example of enrichment experiment. Samples from BSF parasites treated with Myr (-) or YnMyr were subject to CuAAC (click), then pull-down (PD) onto streptavidin-coated beads. Beads were boiled to release bound proteins. Click = aliquot taken after CuAAC but before pull-down; PD S = aliquot taken from supernatant after pull-down; PD B = aliquot of elution from beads after pull-down.

**Figure S6.** Examples of spectra from proteomic identification of YnMyr modified peptides (see also Table S3 and Supporting Data File). For each spectrum: Protein ID\_raw file\_scan number.

Tb927.7.6230\_P6\_YnMyr\_33090

Protein name: ARF3

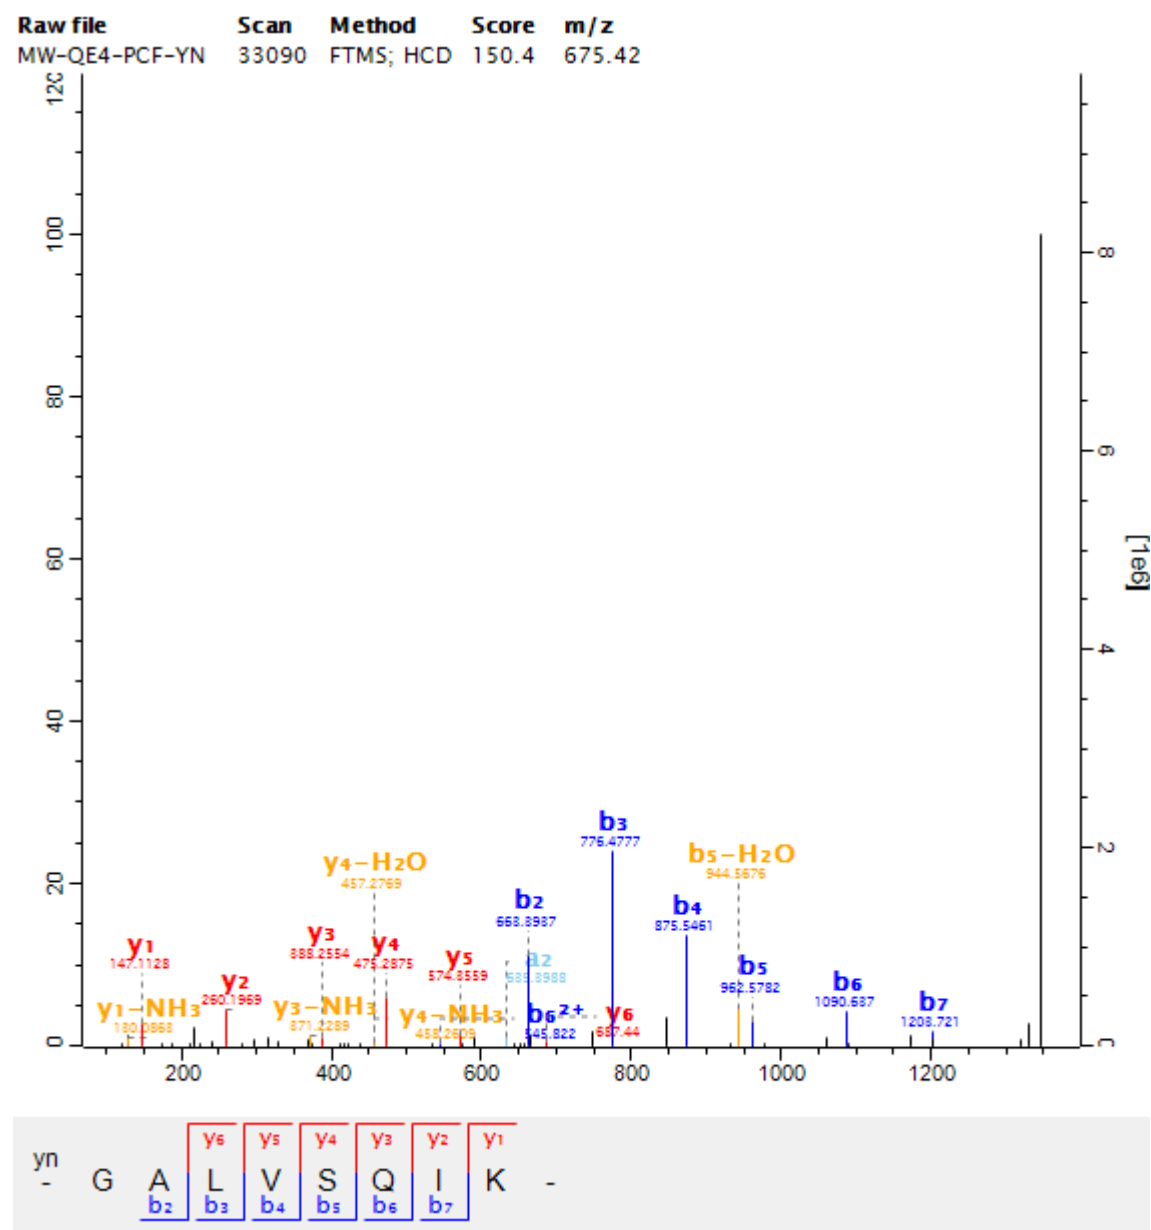

Tb927.1.2260\_P5\_YnMyr\_24329

Protein name: Calpain-like protein fragment (SMP homologue)

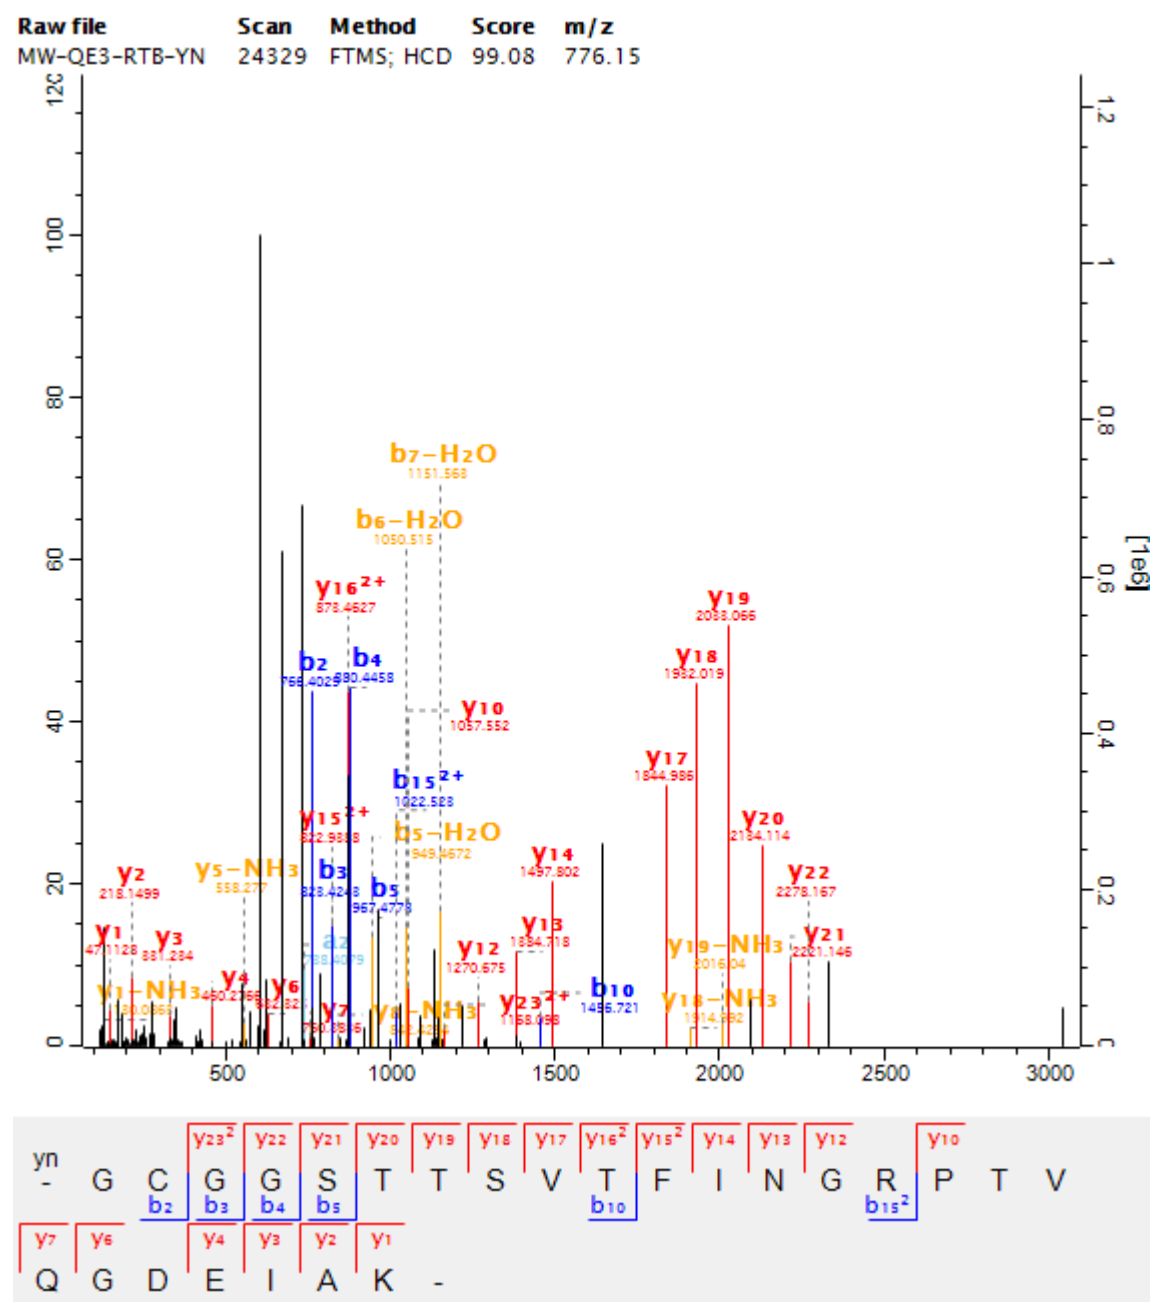

Tb927.10.4930\_P5\_YnMyr\_21563 (AzRTB reagent)

Protein name: PP2C

Raw file Scan Method Score m/z  
MW-QE3-RTB-YN 21563 FTMS; HCD 164.9 579.67

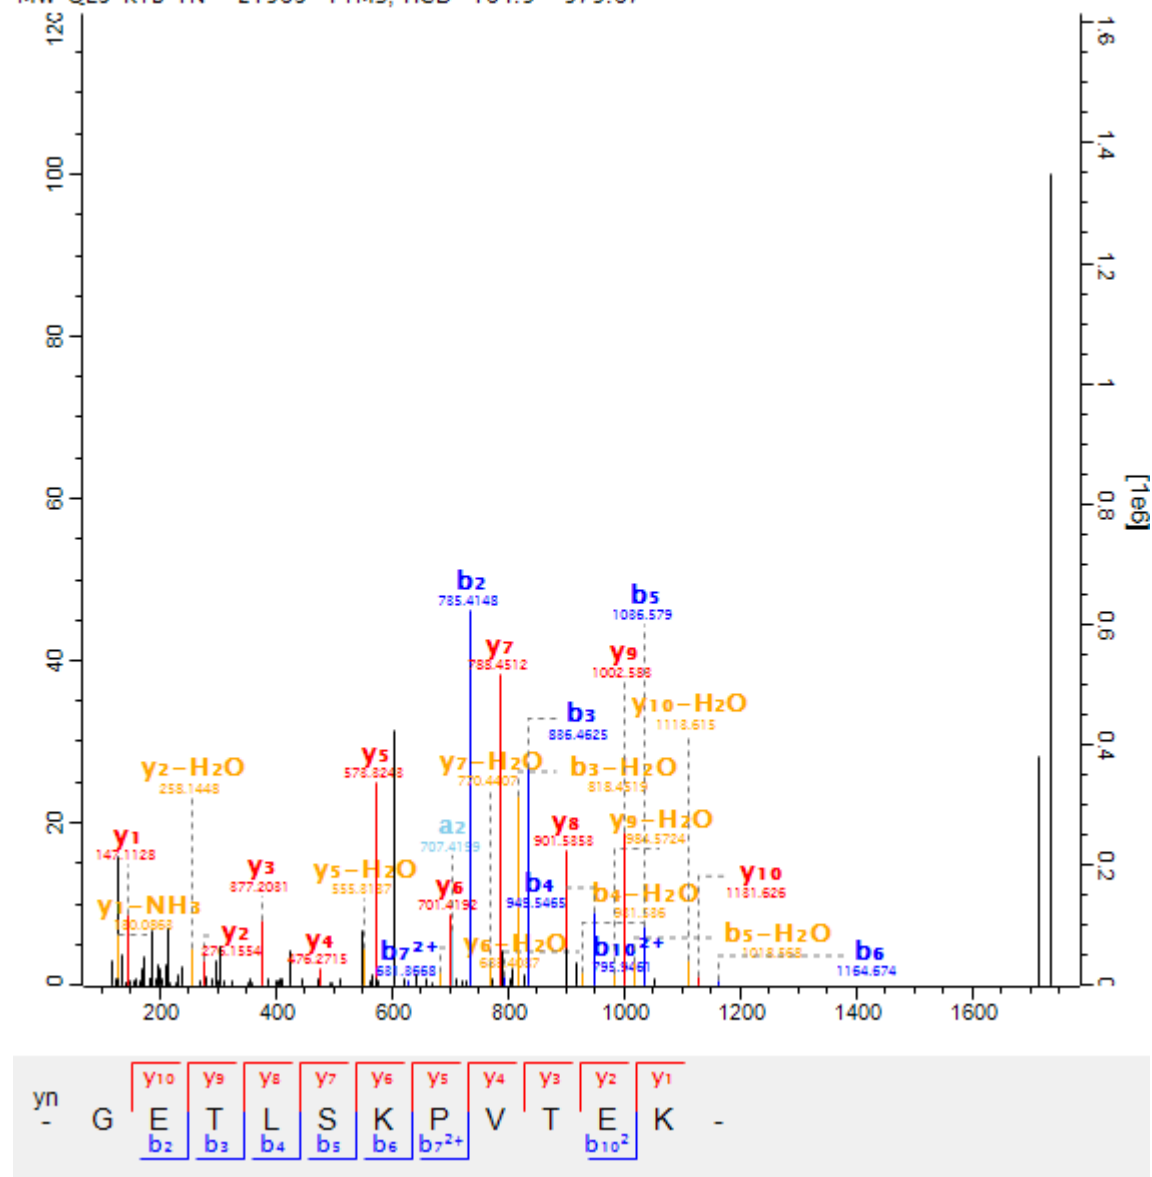

Tb927.10.4930\_P6\_YnMyr\_23100 (AzRB reagent)

Protein name: PP2C

Raw file Scan Method Score m/z  
MW-QE4-PCF-YN 23100 FTMS; HCD 179.72 575.33

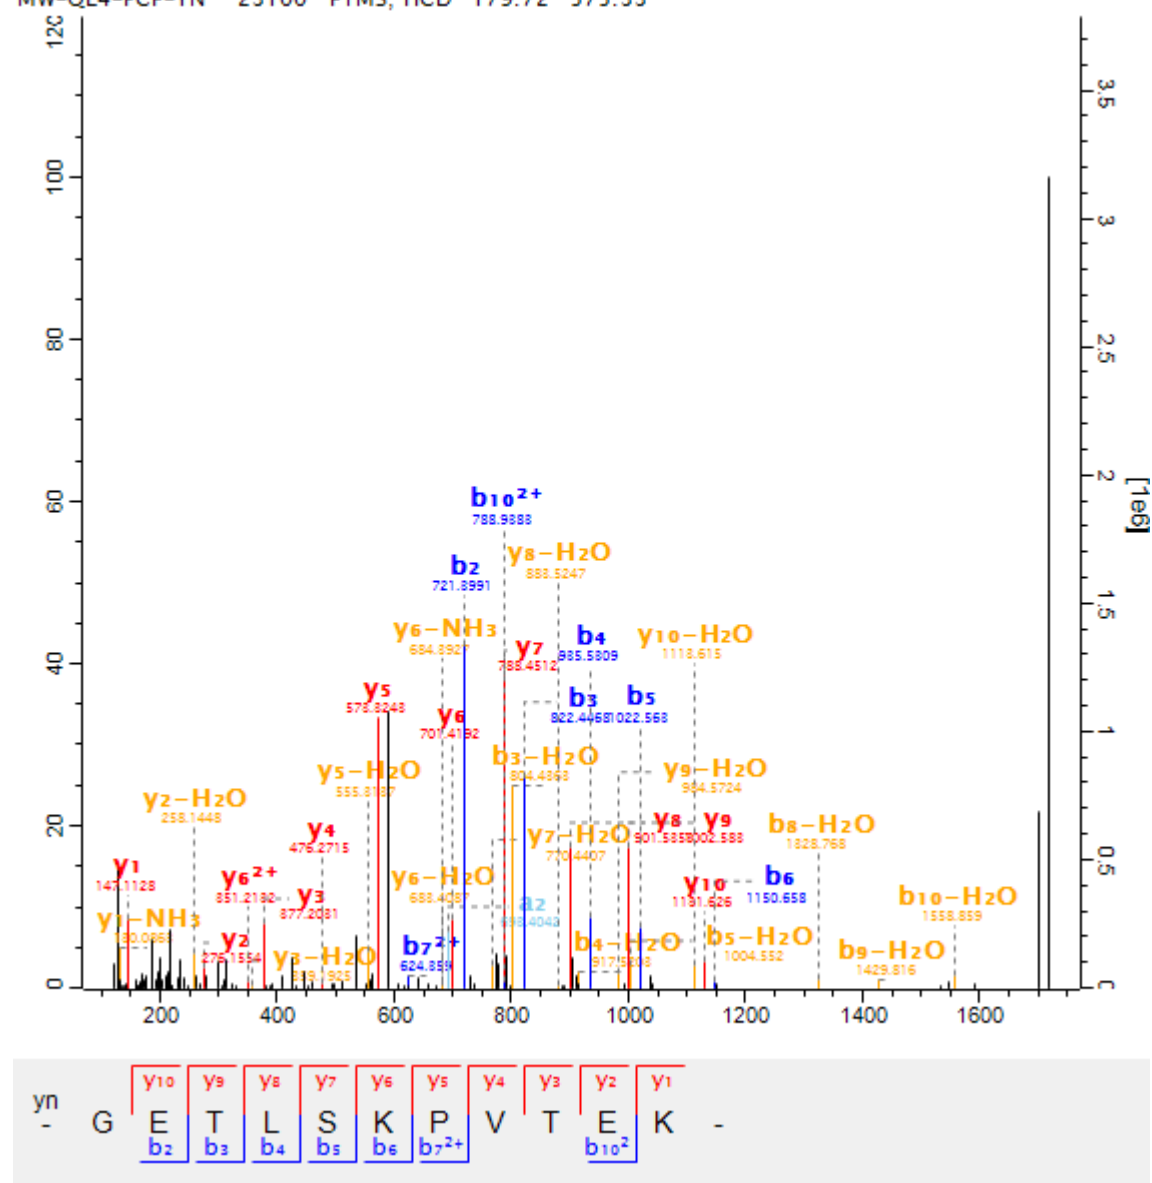

**a.**

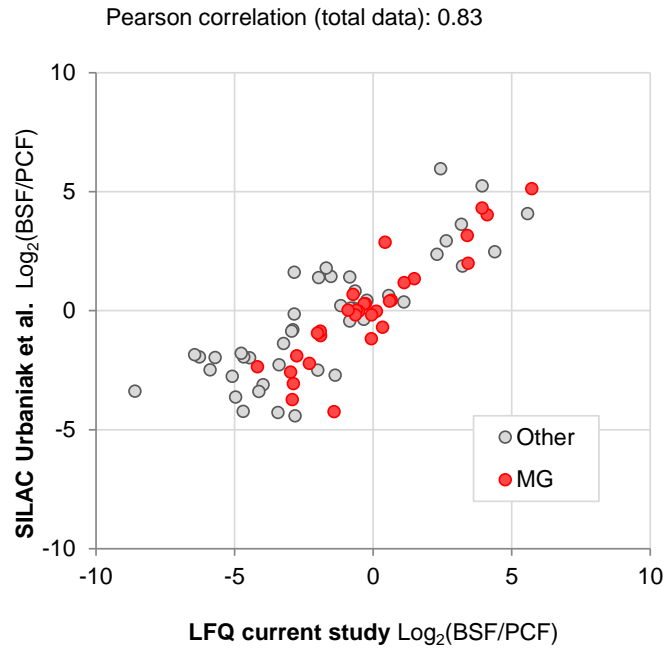

**b.**

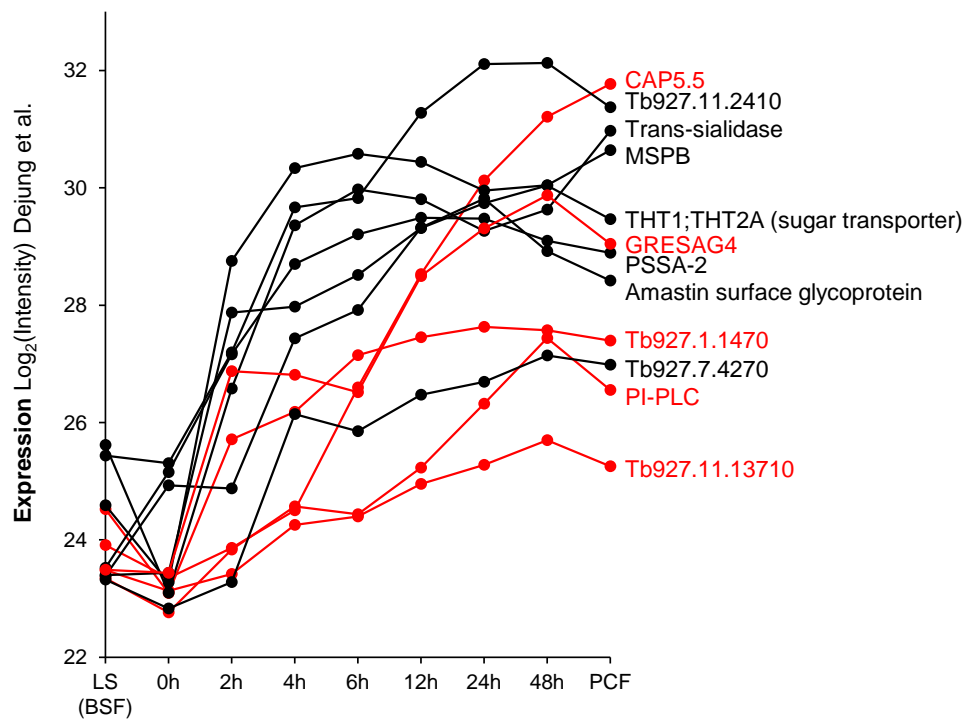

**Figure S7. a.** Comparison of relative abundance of protein hits (defined as significantly enriched in YnMyr over Myr samples) in BSF and PCF parasites in the current study (LFQ quantification; ratio of YnMyr intensities is plotted; see also Table S4) with the study of Urbaniak *et al.* (quantification via SILAC).<sup>1</sup> MG = proteins containing an N-terminal glycine, in red. **b.** Expression profiles of select lipidated proteins during differentiation from short stumpy BSF parasites (0h) to PCF, and expression level in long slender (LS) BSF, using data from Dejung *et al.*<sup>2</sup> Long slender forms were used in the current study. Proteins shown were enriched in PCF in the current study were also upregulated early during differentiation.

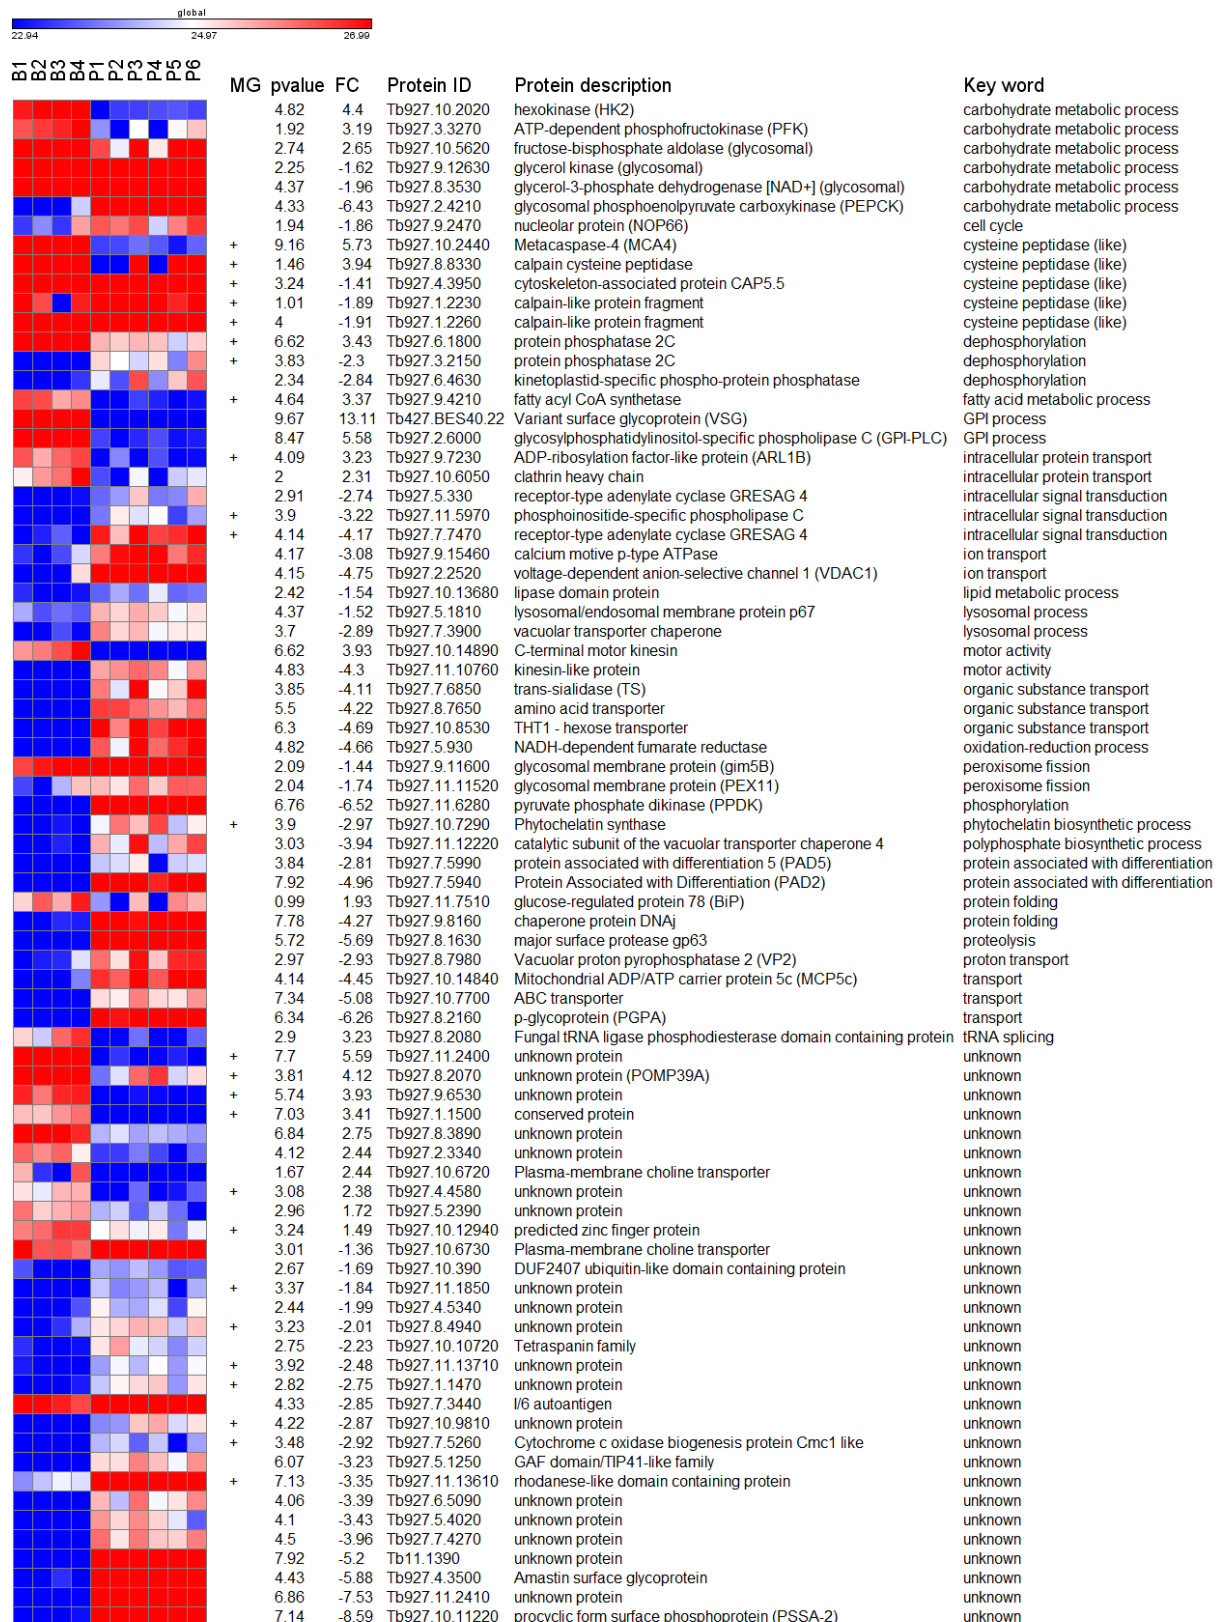

**Figure S8.** Heatmap of YnMyr intensities of all proteins showing significant differences (by t-test) between BSF (B1-B4) and PCF (P1-P6). Colour-coding globally across all rows in the matrix (note that in Fig. 4c colour-coding is within a row). FC = fold-change ( $\log_2(\text{BSF}/\text{PCF})$ ). pvalue =  $-\log_{10}(\text{p-value t-test})$ . MG = protein contains N-terminal glycine. One representative ID and protein name per ProteinGroup is shown (see Supp. Table S4 for complete data). Keyword based on GO annotation from TriTrypDB. Heatmap created with Gene-E (<http://www.broadinstitute.org/cancer/software/GENE-E/index.html>).

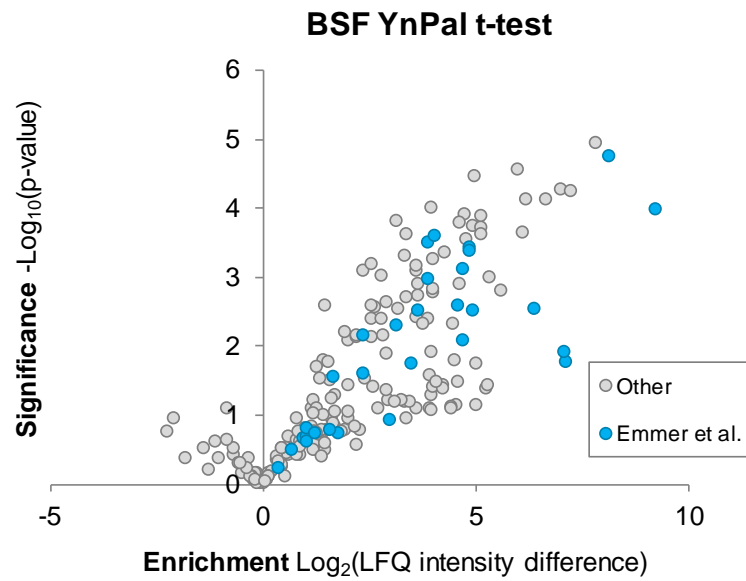

**Figure S9.** Volcano plot comparing LFQ intensities (after imputation of missing values) of YnPal or Pal (palmitic acid) treated BSF parasites (n=3). T-test: 250 permutations; FDR 0.05,  $\alpha$  1. Proteins also identified in palmitoylation studies by Emmer *et al.*<sup>3</sup> are indicated in blue. See also Supp. Table S5.

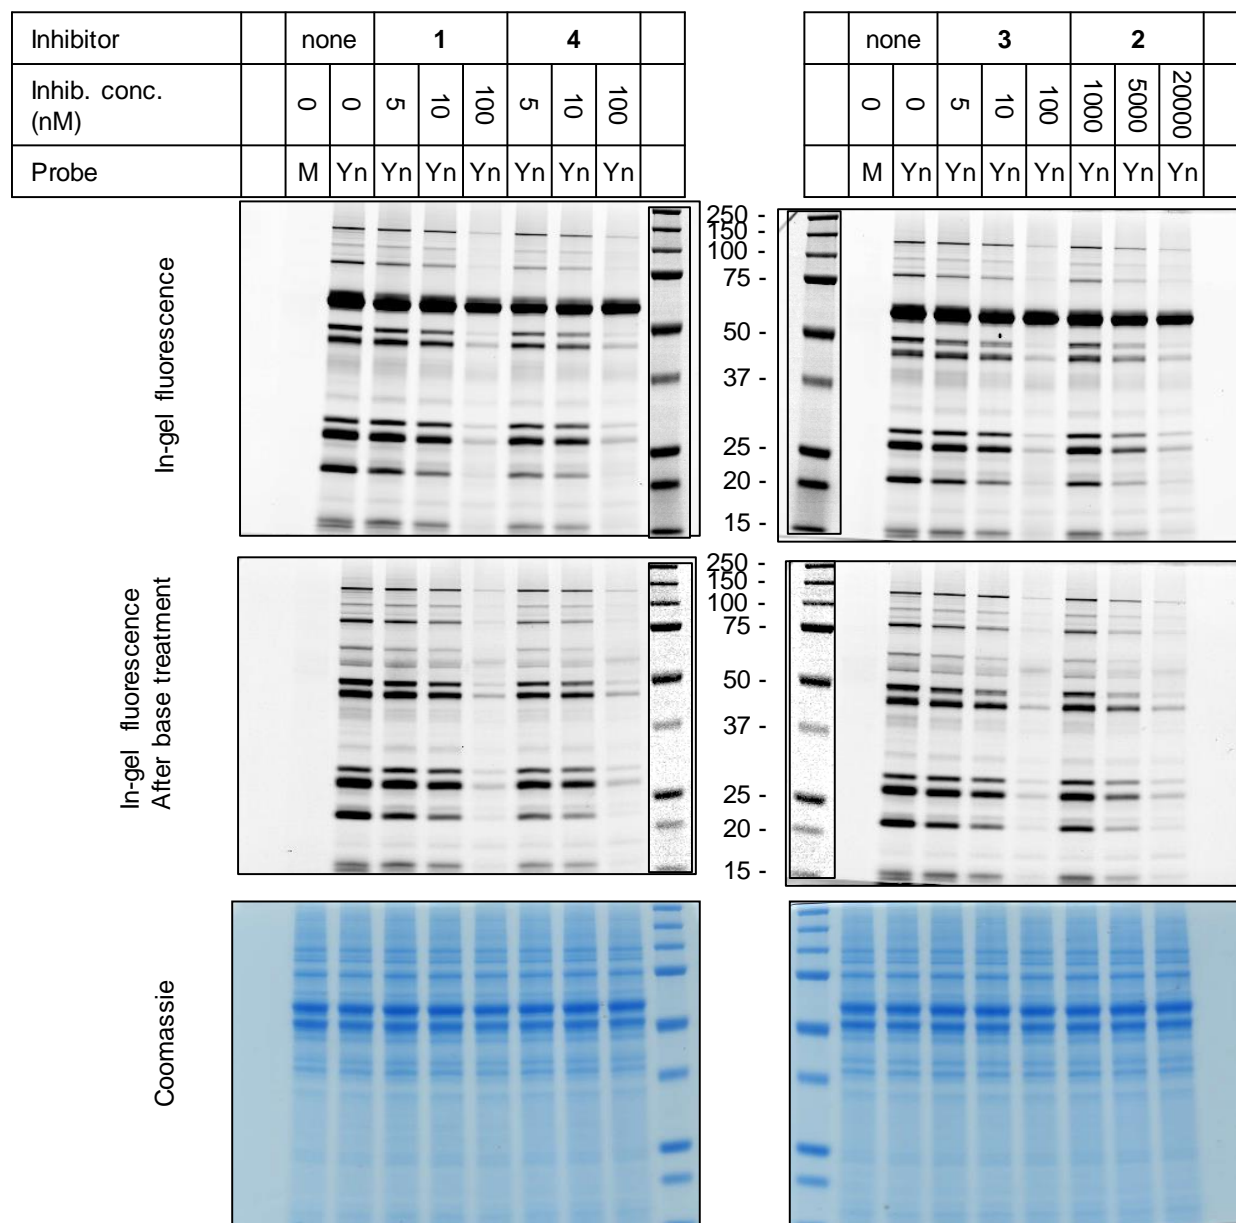

**Figure S10.** Fluorescence-based analysis of samples from *T. brucei* BSF parasites tagged with YnMyr in the presence of NMT inhibitors **1-4** (Fig. 6) at different concentrations. Probe: M = myristic acid; Yn = YnMyr.

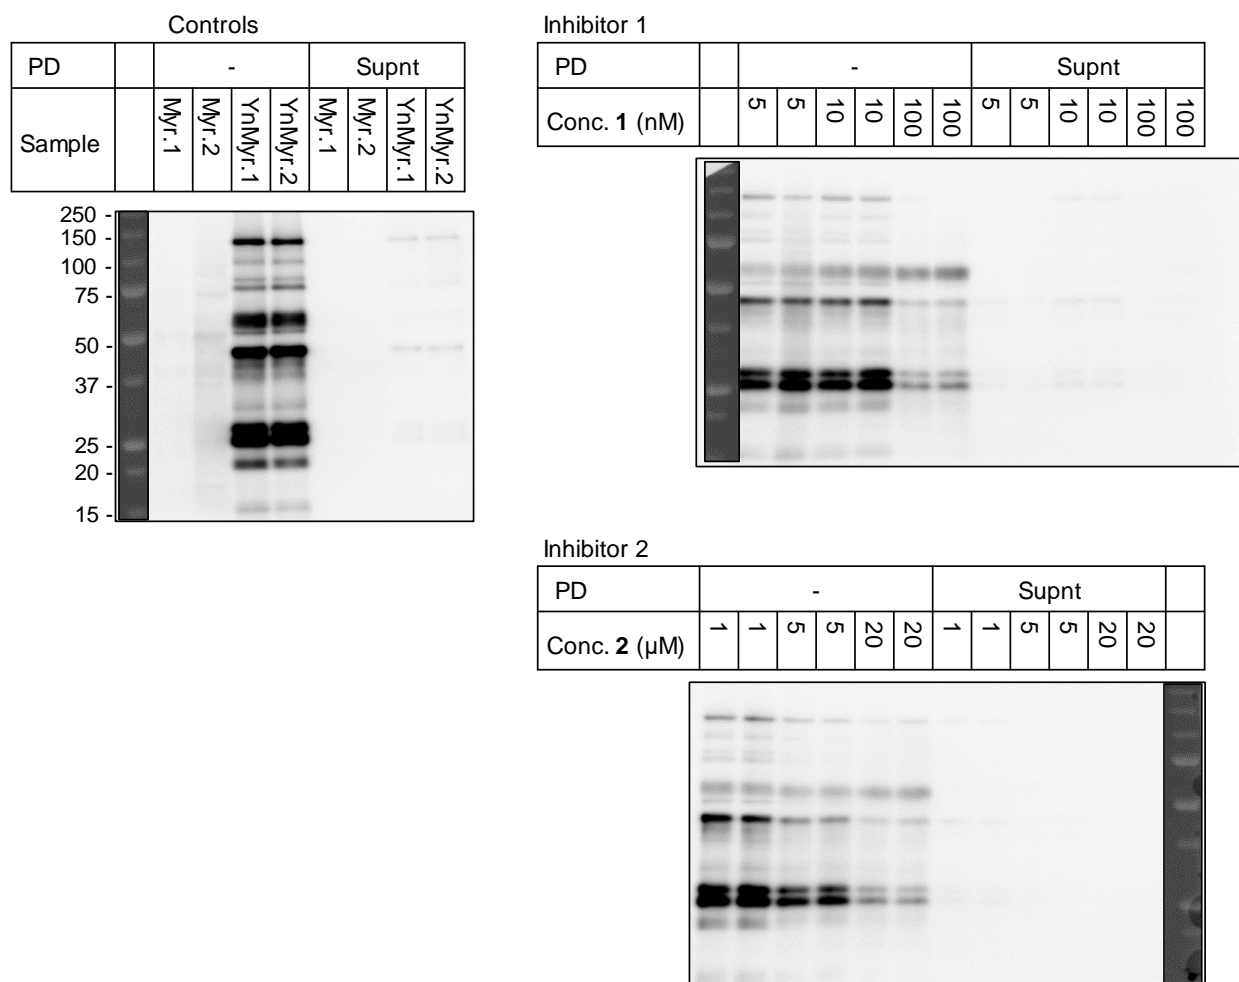

**Figure S11.** NeutrAvidin-HRP Western blots for detection of biotin for inhibition samples prepared for proteomic analysis. *T. brucei* BSF parasites were treated with YnMyr in the presence of inhibitors **1** or **2** at indicated concentrations. Technical duplicate samples were reacted with AzRB by CuAAC, treated with NaOH to remove the majority of GPI-anchor labelling, and enriched by pull-down (PD) onto NeutrAvidin agarose resin. Aliquots were taken before pull-down and of the supernatant (Supnt.) to ensure efficient enrichment onto the beads. Proteins attached to the beads were digested with trypsin for MS analysis.

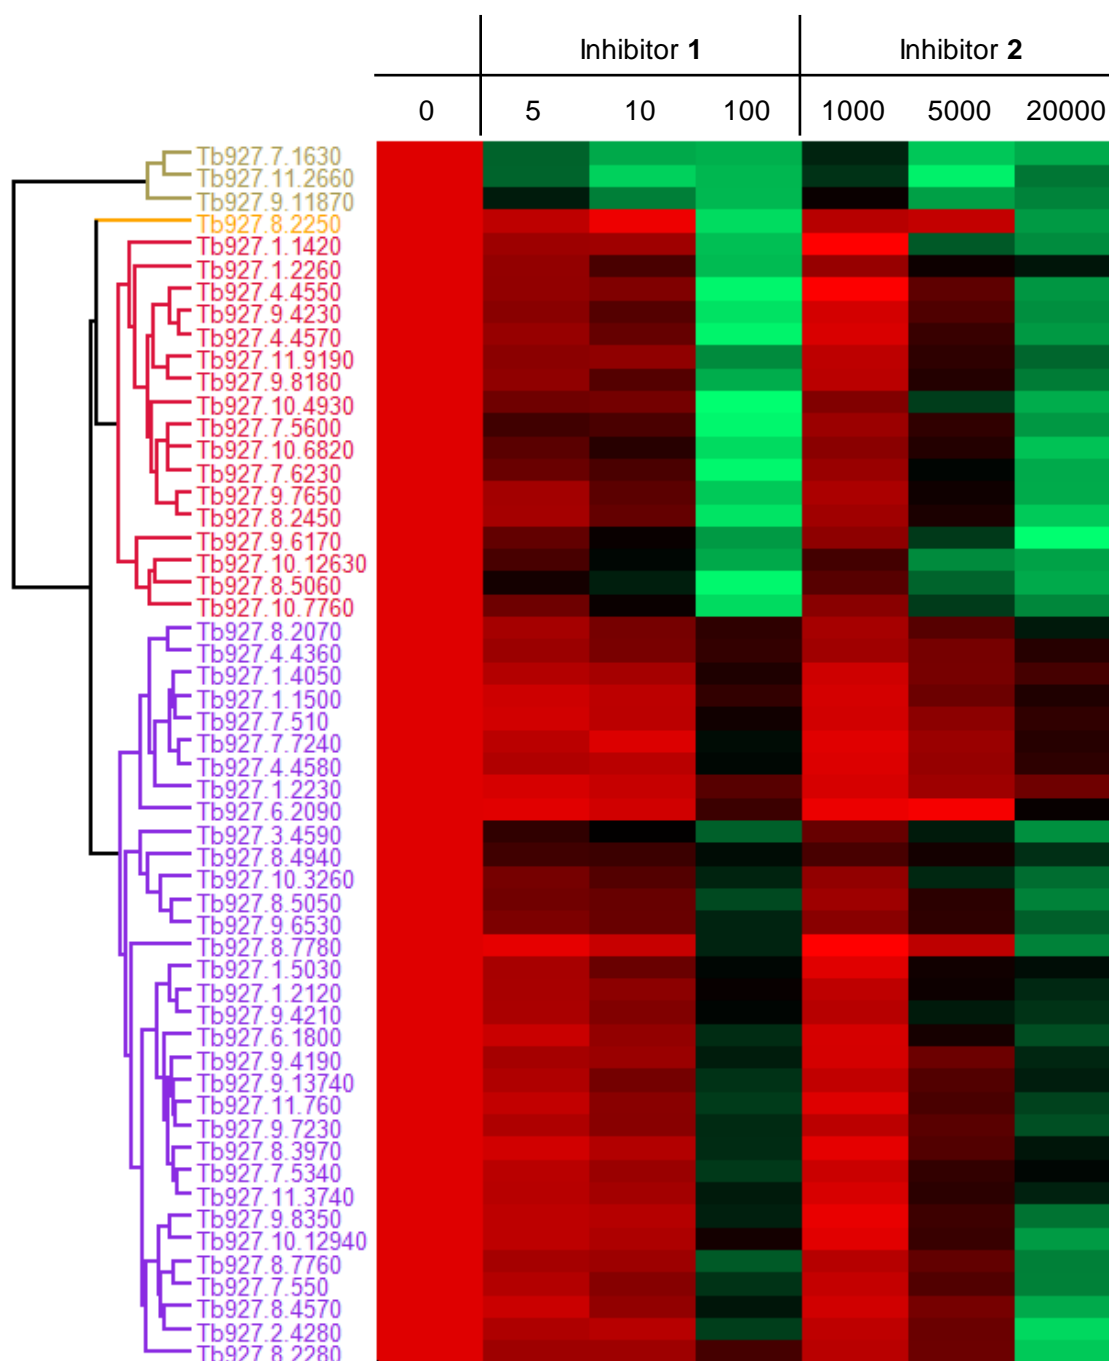

**Figure S12.** Hierarchical clustering of 54 proteins that respond robustly to the highest concentrations of inhibitors **1** and **2**. Performed in Perseus. The four clusters are indicated by different colours at the left (protein IDs). The heat map is coloured from high (red) to low (green) intensity. Data used: normalised enrichment ratios (YnMyr/Myr) – see Table S6.

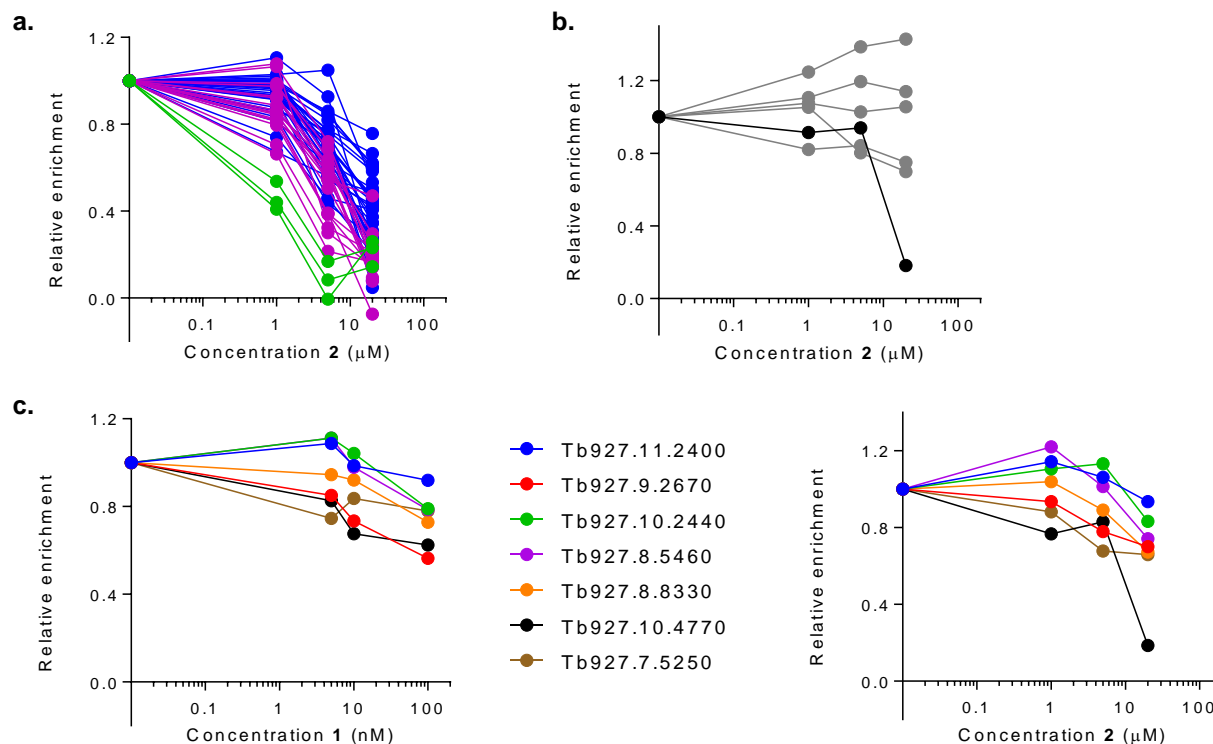

**Figure S13.** Related to Figure 7. **a.** Dose-response plots (treatment with **2**) for protein hits (high confidence hits – see Table S6; colour-coded by clustering). **b.** Dose-response plots (treatment with **2**) for other MG proteins not assigned as hits (grey) and for outlier non-MG protein (Tb927.8.2250, black) that is decreased only at high concentrations of inhibitors. **c.** Dose-response plots for 7 proteins that show only a weak response to NMT inhibitors **1** & **2** but where the YnMyr modified peptide was identified (see Tables S3 and S6).

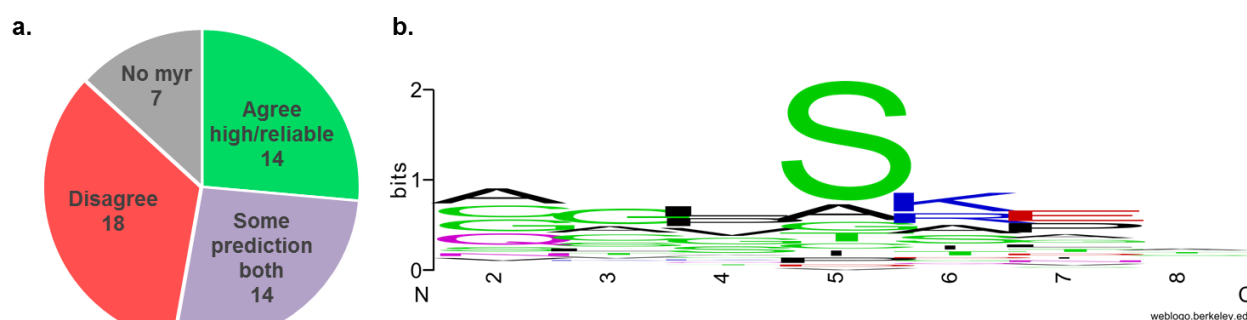

**Figure S14.** **a.** Prediction of *N*-myristoylation by two bioinformatics tools<sup>4</sup> for the proteins identified as high confidence NMT hits in the current study. Related to Supp. Tables S6 and S7. Agree high/reliable = both tools identify protein as high confidence NMT substrate; some prediction both = both tools predict some degree of *N*-myristoylation; disagree = one tool predicts *N*-myristoylation (to some degree) but the other tool does not; no myr = no myristoylation site predicted. **b.** Sequence logo analysis using the N-terminal 8 residues of high confidence NMT hits. Created using Weblogo (<http://weblogo.berkeley.edu/>).

## Supporting Methods

### Enzyme inhibition assays

Assessment of compound inhibition of NMT was carried out as described previously.<sup>5</sup> Data were fitted to a back-corrected IC<sub>50</sub> function using GraFit 7.0 (Erithacus Software Ltd, UK).

### CuAAC labelling and pull-down

**CuAAC.** Proteins were precipitated with chloroform/methanol (MeOH:CHCl<sub>3</sub>:ddH<sub>2</sub>O 4:1:3), or acetone (4 vol. -20 °C 1 h) and then resuspended at 1 mg/mL in 1 % SDS in PBS. This precipitation step was found to increase labeling intensity after CuAAC, likely due to the presence of probe-incorporating glycolipids in the lysates (see main text). Premixed click reagents (100 µM AzTB, 1 mM CuSO<sub>4</sub>, 1 mM TCEP, 100 µM TBTA, final concentrations) were added as described previously<sup>6</sup> and samples vortexed for 1 h RT, then quenched by the addition of 10 mM EDTA. Proteins were precipitated again with MeOH/CHCl<sub>3</sub>, washed with ice-cold MeOH, air-dried for ~15 min, and then resuspended in 2 % SDS, 10 mM EDTA in PBS. For direct gel analysis, 4 x sample loading buffer (SLB, NuPAGE LDS sample buffer) with 2-mercaptoethanol (4 % final) was added and proteins heated for 3 min at 95 °C prior to SDS-PAGE.

**NaOH treatment.** Samples were resuspended after CuAAC as above, then 0.2M NaOH added and samples incubated at RT for 1 hour. Samples were quenched by addition of 4 x SLB.

**Pronase treatment of proteins.** Following CuAAC and resuspension (1% SDS, PBS, without EDTA), samples were split in two and treated with pronase (Sigma) at 1 mg/mL or water (control) from a 10x stock and incubated at 37 °C for 4 h. 4 x SLB was added and proteins heated for 5 min at 90 °C prior to SDS-PAGE.

**Pull-down for gel analysis.** Protein was resuspended following CuAAC at 10 mg/mL in 2 % SDS, 10 mM EDTA in PBS, and then diluted to 1 mg/mL with PBS. DTT (from a fresh 100 x stock in water) was added to give a final concentration of 1 mM. Proteins were incubated with Dynabeads® MyOne™ Streptavidin C1 (pre-washed 3 x 0.2 % SDS in PBS) for 1.5-2 h at RT with rotation. Following removal of the supernatant, beads were washed with 3 x 1 % SDS in PBS, then boiled for 10 mins in SLB to elute bound proteins.

### Gel and Western blot analysis

Samples were separated by SDS-PAGE and the gel soaked in fixing solution (10 % AcOH, 40 % MeOH), then rinsed in water for in-gel fluorescent imaging: gels were scanned with Cy3 filters to detect the TAMRA fluorophore using an Ettan DIGE scanner, GE Healthcare. Molecular weight markers (Precision Plus All Blue Standards, Bio-Rad) were detected with Cy5 filters. For base treatment of gels: the gel was first fixed by treatment with gel soaking solution (10 % AcOH, 40 % MeOH) for 20 min, then washed briefly with water. A solution of 0.5 M NaOH in 50 % MeOH was added and the gel agitated gently for 1 hr at RT. The gel was washed briefly in water and then treated again with gel soaking solution for 20 min. The gel was washed again briefly with water before reimaging.

ImageJ<sup>7</sup> was used for quantification of fluorescent bands. A thin rectangle was dropped down the length of the lane and the 'gel analyzer' function used to plot the profile of intensity down the lane (with averaging across horizontally). The signal was measured by integrating the area under each band of interest and normalizing relative to no inhibition (**YnMyr** only). Any background (from Myr treated sample) was subtracted. Total protein loading was checked by Coomassie. TC<sub>50</sub> was calculated by fitting data to a back-corrected IC<sub>50</sub> function using GraFit 7.0 (Erithacus Software Ltd, UK).

For Western blot detection of biotinylated proteins, proteins were transferred from gels to a PVDF membrane (Immobilon-PSQ, Millipore) using a semi-dry Western blot system (Invitrogen). Tris-glycine transfer buffer (NuPAGE, Invitrogen) was used to soak the blotting paper (2.5 mm paper, Invitrogen) and membrane prior to transfer. PVDF membrane was soaked first in MeOH (~30 sec), then water (2 min) before soaking in transfer buffer (at least 5 min). Transfer took 27 min at 20 V. Membranes were blocked for 1 hr RT with BSA (3 % w/v in 10 mL TBST) and then washed with TBST (3 x 10 mL for 5 min). Membranes were then incubated with NeutrAvidin-HRP (1:10000, Invitrogen) in TBST for one hour and washed again with TBST (3 x 10 mL for 10 min). Detection was carried out using Luminata Crescendo Western HRP substrate (Millipore) according to the manufactures instructions and on a Fujifilm LAS 3000 imager.

## Proteomics experiments

**Pull-down and preparation of peptides for MS.** 0.25-0.5 mg lysate was prepared for proteomic analysis. Proteins were precipitated with acetone (4 volumes added and sample left at -20 °C for at least 1 h) or chloroform/methanol and resuspended at 1 mg/mL in 1% SDS in PBS. Chloroform/methanol precipitation: 4 volumes of MeOH were added, followed by 1 volume of CHCl<sub>3</sub> and 3 volumes of H<sub>2</sub>O, with vortexing between each addition. Samples were vortexed vigorously and centrifuged at 17,000 xg for 5 min at RT. The top aqueous-MeOH layer was removed and 4 volumes of MeOH added. Samples were gently mixed and centrifuged again. The supernatant was removed and the pellet washed 2x with MeOH.

Proteins were captured by CuAAC as before with the following modifications: CuAAC reaction was carried out for 2 hours and, for some samples, with AzRB or AzRTB in place of AzTB. When AzRB/RTB was used, proteins were precipitated following CuAAC via a modified chloroform/methanol precipitation procedure: 4 volumes of MeOH, 1 vol. CHCl<sub>3</sub>, 3 vol. H<sub>2</sub>O were added to the sample, which was centrifuged at 17,000 xg for 5 min to pellet proteins at the interface. Both layers were then removed simultaneously, the pellet resuspended in 0.2 % SDS/PBS to the original volume and the precipitation procedure repeated. The pellet was then washed 2x with MeOH. Proteins were finally resuspended at 10 mg/mL in 2 % SDS, 10 mM EDTA in PBS, and then diluted to 1 mg/mL with PBS. DTT (from a fresh 100 x stock in water) was added to give a final concentration of 1 mM.

For base-treatment (inhibition samples), proteins were resuspended in 50 µL 2 % SDS, 10 mM EDTA in PBS; to this was added 50 µL PBS and 25 µL 2M NaOH. Samples were shaken for 1 hr RT then 25 µL 2M HCl added to neutralise; next 350 µL PBS was added and 5 µL 0.1M DTT (giving 1 mM DTT final concentration). Samples were centrifuged at 17000xg, 10 min RT to pellet any undissolved protein.

Affinity enrichment were performed for all samples as before with the following modifications: NeutrAvidin agarose resin (Thermo Scientific, pre-washed 3 x 0.2 % SDS in PBS; typically 50 µL of bead slurry was used for 0.5 mg of lysate) was used in place of the magnetic Dynabeads. Beads were stringently washed following pull-down: 3 x 1 % SDS in PBS, 3 x 4M Urea in 50 mM PBS, 5 x AMBIC (50 mM ammonium bicarbonate). For a 50 µL bed of beads resuspended in 50 µL AMBIC, samples were reduced (5 µL of 100 mM DTT in 50 mM AMBIC) at 60 °C for 30 minutes and allowed to cool to room temperature. The beads were washed with 2 x AMBIC. Cysteines were alkylated (5 µL of 100 mM iodoacetamide in AMBIC) at room temperature for 30 min in the dark. The beads were washed with 2 x AMBIC. Trypsin (1 µg Sequencing Grade Modified Trypsin (Promega) dissolved at 0.2 µg/µL in AMBIC per mg starting lysate) was added to the beads and samples were placed on a shaker and digested overnight at 37 °C. The samples were centrifuged and the supernatant was transferred into clean tubes. The beads were washed twice with 0.1% aqueous formic acid, and these washes were combined with the

first supernatant. The solutions were stage-tipped according to a published protocol<sup>8</sup>. Elution from the sorbent (SDC-XC from 3M) with 70 % acetonitrile in water was followed by speed-vac-assisted solvent removal, reconstitution of peptides in 0.5 % TFA, 2 % acetonitrile in water, and transferred into LC-MS sample vials.

**LC-MS/MS analysis.** The analysis was performed using an Acclaim PepMap RSLC column 50 cm × 75 µm inner diameter (Thermo Fisher Scientific) using a 2 h acetonitrile gradient in 0.1 % aqueous formic acid at a flow rate of 250 nL/min. Easy nLC-1000 was coupled to a Q Exactive mass spectrometer via an easy-spray source (all Thermo Fisher Scientific). The Q Exactive was operated in data-dependent mode with survey scans acquired at a resolution of 75,000 at m/z 200 (transient time 256 ms). Up to 10 of the most abundant isotope patterns with charge +2 or higher from the survey scan were selected with an isolation window of 3.0 m/z and fragmented by HCD with normalized collision energies of 25. The maximum ion injection times for the survey scan and the MS/MS scans (acquired with a resolution of 17 500 at m/z 200) were 20 and 120 ms, respectively. The ion target value for MS was set to 10<sup>6</sup> and for MS/MS to 10<sup>5</sup>, and the intensity threshold was set to 8.3 × 10<sup>2</sup>.

**Further notes on data processing.** An error in database redundancy was noted: ARF proteins Tb927.9.13740, Tb927.9.13710 and Tb927.9.13680 have identical sequences; Tb927.9.13650 differs by just one amino acid.

**Bioinformatics and comparisons with literature datasets.** Prediction of myristoylation was performed using the Myristoylator (<http://web.expasy.org/myristoylator/>)<sup>4a</sup> and the NMT Predictor (<http://mendel.imp.ac.at/myristate/SUPLpredictor.htm>).<sup>4b</sup> Prediction of S-palmitoylation was carried out using CSS-Palm 3.0 (downloaded from <http://csspalm.biocuckoo.org/>) with threshold set to 'high'.<sup>9</sup>

For analysis of hits during differentiation of *T. brucei* from BSF to PCF, the dataset of Dejung *et al.* was used.<sup>2</sup> Briefly, the LFQ intensity data (ProteinGroups file) was downloaded from PRIDE (PXD003319), intensities logarithmized (base 2) and missing intensities imputed with random numbers from a normal distribution, whose mean and standard deviation were chosen to simulate low abundance values close to noise level (impute criteria: width 0.1 and down shift 2.1; imputation for each sample individually). Intensities were averaged (mean) across replicates and cross-referenced with the current dataset to generate profile plots of select proteins during the differentiation process (Fig. S7).

## References

1. Urbaniak, M. D.; Guthrie, M. L.; Ferguson, M. A., Comparative SILAC proteomic analysis of *Trypanosoma brucei* bloodstream and procyclic lifecycle stages. *PLoS One* **2012**, 7 (5), e36619.
2. Dejung, M.; Subota, I.; Bucerius, F.; Dindar, G.; Freiwald, A.; Engstler, M.; Boshart, M.; Butter, F.; Janzen, C. J., Quantitative Proteomics Uncovers Novel Factors Involved in Developmental Differentiation of *Trypanosoma brucei*. *PLoS Pathog.* **2016**, 12 (2), e1005439.
3. Emmer, B. T.; Nakayasu, E. S.; Souther, C.; Choi, H.; Sobreira, T. J.; Epting, C. L.; Nesvizhskii, A. I.; Almeida, I. C.; Engman, D. M., Global analysis of protein palmitoylation in African trypanosomes. *Eukaryot. Cell* **2011**, 10 (3), 455-63.
4. (a) Bologna, G.; Yvon, C.; Duvaud, S.; Veuthey, A. L., N-Terminal myristoylation predictions by ensembles of neural networks. *Proteomics* **2004**, 4 (6), 1626-32; (b) Maurer-Stroh, S.; Eisenhaber, B.; Eisenhaber, F., N-terminal N-myristoylation of proteins: prediction of substrate proteins from amino acid sequence. *J. Mol. Biol.* **2002**, 317 (4), 541-57.
5. Bell, A. S.; Mills, J. E.; Williams, G. P.; Brannigan, J. A.; Wilkinson, A. J.; Parkinson, T.; Leatherbarrow, R. J.; Tate, E. W.; Holder, A. A.; Smith, D. F., Selective Inhibitors of Protozoan Protein N-myristoyltransferases as Starting Points for Tropical Disease Medicinal Chemistry Programs. *PLoS Negl. Trop. Dis.* **2012**, 6 (4), e1625.

6. Heal, W. P.; Wright, M. H.; Thinon, E.; Tate, E. W., Multifunctional protein labeling via enzymatic N-terminal tagging and elaboration by click chemistry. *Nat. Protoc.* **2012**, *7* (1), 105-17.
7. Schneider, C. A.; Rasband, W. S.; Eliceiri, K. W., NIH Image to ImageJ: 25 years of image analysis. *Nat. Methods* **2012**, *9* (7), 671-5.
8. Rappsilber, J.; Ishihama, Y.; Mann, M., Stop and go extraction tips for matrix-assisted laser desorption/ionization, nanoelectrospray, and LC/MS sample pretreatment in proteomics. *Anal. Chem.* **2003**, *75* (3), 663-70.
9. (a) Ren, J.; Wen, L.; Gao, X.; Jin, C.; Xue, Y.; Yao, X., CSS-Palm 2.0: an updated software for palmitoylation sites prediction. *Protein Eng. Des. Sel.* **2008**, *21* (11), 639-44; (b) Zhou, F.; Xue, Y.; Yao, X.; Xu, Y., CSS-Palm: palmitoylation site prediction with a clustering and scoring strategy (CSS). *Bioinformatics* **2006**, *22* (7), 894-6.
